# Supplementary material
Source: PubMed Central journal article supplement (PMC4292493)
Supplement: AEM.03699-14_zam999116002so1.pdf [file AEM.03699-14_zam999116002so1.pdf]

1

2

3 **Supplementary information**

4 **Table S1.** *F. psychrophilum* ancestral and phage-resistant isolates used in this study

| <b>Strain</b> | <b>Phage used for selection</b> | <b>Reference</b>                | <b>Accession number</b> |
|---------------|---------------------------------|---------------------------------|-------------------------|
| 950106-1/1    | -                               | (1)                             | CP008902                |
| V1-20         | FpV4                            | Christiansen et al. Unpublished | CP008879                |
| V2-20         | FpV21                           | Christiansen et al. Unpublished | CP008880                |
| V3-5          | FpV4                            | Christiansen et al. Unpublished | CP008878                |
| V4-24         | Cocktail 11 different phages*   | Christiansen et al. Unpublished | CP008881                |
| V4-28         | Cocktail 11 different phages*   | Christiansen et al. Unpublished | CP008882                |
| V4-33         | FpV21                           | Christiansen et al. Unpublished | CP008883                |

5 \* Cockatil consisting of 11 phages Fpv1, Fpv2, Fpv3, Fpv4, Fpv9, Fpv13, Fpv15, Fpv17, Fpv19,  
6 Fpv21 and Fpv22 previously described by Stenholm, et al. (1)

7

8

9

10

11

12 **Table S2. Bacteriophages used in this study**

| <b>Bacteriophage</b> | <b>Site origin</b>   | <b>Isolation strain</b> | <b>Year</b> | <b>Phage family</b> | <b>Genome size (kbp)</b> | <b>Reference</b> |
|----------------------|----------------------|-------------------------|-------------|---------------------|--------------------------|------------------|
| 1H                   | Chile. Los Lagos     | MH1                     | 2008        | <i>Siphoviridae</i> | 50                       | (2)              |
| 6H                   | Chile. Los Lagos     | MH1                     | 2008        | <i>Siphoviridae</i> | 50                       | (2)              |
| 2P                   | Chile. X región      | PG2                     | 2009        | <i>Siphoviridae</i> | 50                       | (2)              |
| 23T                  | Chile. Santiago      | T23                     | 2009        | <i>Siphoviridae</i> | 50                       | (2)              |
| 2A                   | Chile. Los Ángeles   | A2                      | 2009        | <i>Podoviridae</i>  | 50                       | (2)              |
| P1                   | Chile. Puerto Montt  | PL1R2                   | 2011        | ND                  | ND                       | (2)              |
| P2                   | Chile. Puerto Montt  | PL1R2                   | 2011        | ND                  | ND                       | (3)              |
| P3                   | Chile. Puerto Montt  | PL1R2                   | 2011        | ND                  | ND                       | (3)              |
| P4                   | Chile. Puerto Montt  | PL1R2                   | 2011        | ND                  | ND                       | (3)              |
| P5                   | Chile. Puerto Montt  | PL1R2                   | 2011        | ND                  | ND                       | (3)              |
| Fpv1                 | Denmark. Fish Farm C | 950106-1/1              | 2005        | ND                  | 90                       | (1)              |
| Fpv2                 | Denmark. Fish Farm C | 950106-1/1              | 2005        | <i>Podoviridae</i>  | 90                       | (1)              |
| Fpv3                 | Denmark. Fish Farm K | 950106-1/1              | 2005        | ND                  | 90                       | (1)              |
| Fpv4                 | Denmark. Fish Farm L | 950106-1/1              | 2005        | <i>Podoviridae</i>  | 90                       | (1)              |
| Fpv5                 | Denmark. Fish Farm E | 950106-1/1              | 2005        | ND                  | 48                       | (1)              |
| Fpv6                 | Denmark. Fish Farm E | 950106-1/1              | 2005        | ND                  | 48                       | (1)              |
| Fpv7                 | Denmark. Fish Farm E | 950106-1/1              | 2005        | <i>Siphoviridae</i> | 48                       | (1)              |
| Fpv8                 | Denmark. Fish Farm E | 950106-1/1              | 2005        | ND                  | 48                       | (1)              |
| Fpv9                 | Denmark. Fish Farm F | 950106-1/1              | 2005        | <i>Siphoviridae</i> | 48                       | (1)              |
| Fpv10                | Denmark. Fish Farm H | 950106-1/1              | 2005        | <i>Siphoviridae</i> | 48                       | (1)              |
| Fpv11                | Denmark. Fish Farm H | 950106-1/1              | 2005        | ND                  | 48                       | (1)              |
| Fpv12                | Denmark. Fish Farm F | Mixture*                | 2005        | ND                  | 12                       | (1)              |
| Fpv13                | Denmark. Fish        | Mixture*                | 2005        | ND                  | 12                       | (1)              |

|       |                      |                      |      |                     |    |     |
|-------|----------------------|----------------------|------|---------------------|----|-----|
|       | Farm F               |                      |      |                     |    |     |
| Fpv14 | Denmark. Fish Farm I | 950106-1/1           | 2005 | <i>Siphoviridae</i> | 12 | (1) |
| Fpv15 | Denmark. Fish Farm I | 950106-1/1           | 2005 | ND                  | 12 | (1) |
| Fpv16 | Denmark. Fish Farm O | Mixture <sup>a</sup> | 2005 | ND                  | 12 | (1) |
| Fpv17 | Denmark. Fish Farm O | Mixture <sup>a</sup> | 2005 | ND                  | 12 | (1) |
| Fpv18 | Denmark. Fish Farm P | Mixture <sup>a</sup> | 2005 | ND                  | 10 | (1) |
| Fpv19 | Denmark. Fish Farm L | 950106-1/1           | 2005 | ND                  | 8  | (1) |
| Fpv20 | Denmark. Fish Farm L | 950106-1/1           | 2005 | ND                  | ND | (1) |
| Fpv21 | Denmark. Fish Farm L | 950106-1/1           | 2005 | ND                  | ND | (1) |
| Fpv22 | Denmark. Fish Farm O | Mixture*             | 2005 | ND                  | ND | (1) |

13 **ND: not determined**

14

15

16

17

18

19

20 **Table S3.** Genes with mutations in *F. psychrophilum* phage-resistant isolates

| Gene accession                            | Type of mutation     | Phage-resistant isolates    | Function                                                               | <sup>a</sup> Cellular localization | <sup>b</sup> TMH/SP | <sup>c</sup> Effect mutation |
|-------------------------------------------|----------------------|-----------------------------|------------------------------------------------------------------------|------------------------------------|---------------------|------------------------------|
| WP_0119<br>62354.1-<br>WP_0119<br>62360.1 | Deletions/insertions | All                         | Probable cell surface protein (leucine rich repeat proteins in tandem) | CyM                                | -/+                 | I/R                          |
| WP_0119<br>64261.1                        | Deletion             | All                         | Two-component system response regulatory protein, LytTR family         | CyM                                | -/-                 | D                            |
| WP_0163<br>61986.1                        | Deletion             | V1-20;V4-24;<br>V4-28;V4-33 | Putative adhesin                                                       | CyM                                | +/+                 | SC                           |
| WP_0119<br>62492.1                        | Deletion             | V1-20;V4-24;<br>V4-28;V4-33 | Probable outer membrane protein precursor OmpA family                  | CyM                                | +/+                 | D                            |
| WP_0119<br>63051.1                        | Insertion            | V1-20;V3-5                  | 50S ribosomal protein L20                                              | Cy                                 | -/-                 | FS                           |
| WP_0119<br>62491.1                        | Deletion             | V1-20;V4-24;<br>V4-28;V4-33 | Hypothetical protein precursor                                         | Cy                                 | -/-                 | D                            |
| WP_0119<br>63061.1                        | Deletion             | All                         | Threonine-tRNA ligase                                                  | Cy                                 | -/-                 | FS                           |
| WP_0119<br>63567.1                        | Insertion            | V4-33                       | Phytoene dehydrogenase                                                 | Cy                                 | -/-                 | SC                           |
| WP_0119<br>64125.1                        | Insertion            | V1-20                       | Riboflavin biosynthesis protein RibD                                   | Cy                                 | -/-                 | SC                           |
| WP_0119<br>64316.1                        | Deletion             | All                         | NADH dehydrogenase I, F subunit                                        | Cy                                 | -/-                 | FS                           |
| WP_0119<br>64122.1                        | Insertion            | V1-20                       | ABC-type transport system, permease component                          | CyM                                | -/-                 | AC                           |
| <u>WP_0119</u><br><u>64239.1</u>          | Deletion             | V2-20                       | Major facilitator superfamily (MFS) permease                           | CyM                                | +/-                 | D                            |
| WP_0119<br>64253.1                        | Deletion             | V2-20; V4-24                | Putative transporter                                                   | Uk                                 | -/-                 | D                            |

|                    |                          |                           |                                                           |     |     |    |
|--------------------|--------------------------|---------------------------|-----------------------------------------------------------|-----|-----|----|
| WP_0119<br>63428.1 | Deletion                 | V4-33                     | UDP-N-acetyl-D-galactosamine dehydrogenase                | Cy  | -/- | SC |
| WP_0119<br>63518.1 | Deletion                 | V2-20                     | UDP-N-acetylmuramoyl-tripeptide-D-alanyl-D-alanine ligase | Cy  | -/- | D  |
| WP_0119<br>63517.1 | Deletion                 | V2-20                     | Gliding motility lipoprotein GldJ                         | Uk  | -/+ | FS |
| WP_0119<br>64073.1 | Insertion                | V4-24                     | Gliding motility protein GldM                             | Uk  | +/+ | SC |
| WP_0119<br>64075.1 | Deletion                 | V1-20                     | Gliding motility protein GldK                             | Uk  | -/+ | SC |
| -                  | Insertion                | V2-20                     | Truncated collagenase precursor, C-terminal region        | Uk  | -/- | -  |
| WP_0119<br>64246.1 | Insertion                | V4-28                     | Probable type II restriction endonuclease                 | Cy  | -/- | AC |
| WP_0163<br>61990.1 | Deletion                 | V1-20; V3-5; V4-24; V4-28 | Transposase mutator type                                  | Cy  | -/- | D  |
| WP_0119<br>63984.1 | Deletions and insertions | V3-5; V4-28;              | Hypothetical protein                                      | Uk  | -/- | I  |
| WP_0119<br>64255.1 | Insertion                | V4-33                     | Hypothetical protein                                      | Uk  | -/- | SC |
| -                  | Deletion                 | V1-20; V3-5               | Pseudo protein                                            | Uk  | -/- | D  |
| WP_0119<br>64240.1 | Deletion                 | V1-20                     | Hypothetical protein                                      | Cy  | -/- | D  |
| WP_0119<br>64241.1 | Deletion                 | V3-5                      | Hypothetical protein                                      | Uk  | +/- | D  |
|                    | Deletion                 | V1-20; V3-5               | Hypothetical protein                                      | Uk  | -/- | D  |
| WP_0119<br>64258.1 | Deletion                 | All                       | Hypothetical protein                                      | CyM | +/- | D  |
| WP_0119<br>64259.1 | Deletion                 | All                       | Hypothetical protein                                      | Uk  | -/- | D  |

|                |           |                     |                                                                   |     |     |    |
|----------------|-----------|---------------------|-------------------------------------------------------------------|-----|-----|----|
| WP_011964260.1 | Deletion  | All                 | Hypothetical protein                                              | Cy  | -/- | D  |
| WP_011963641.1 | Insertion | V3-5                | Protein of unknown function                                       | Cy  | -/- | FS |
| WP_011963641.1 | Insertion | V3-5                | Protein of unknown function                                       | Cy  | -/- | SC |
| WP_011964255.1 | Insertion | All                 | Protein of unknown function                                       | CyM | +/- | SC |
| WP_011962979.1 | Deletion  | V4-24; V4-28; V4-33 | Protein of unknown function                                       | CyM | +/- | D  |
| WP_011963238.1 | Deletion  | All                 | Protein of unknown function                                       | Cy  | -/+ | SC |
| WP_011964251.1 | Insertion | V4-24               | Protein of unknown function putative pseudogene C-terminal region | -   | -   | -  |
| WP_011964252.1 | Insertion | V4-24               | Protein of unknown function putative pseudogene N-terminal region | -   | -   | -  |
| WP_011964254.1 | Deletion  | V2-20;V4-24         | Protein unknown function                                          | Uk  | -/- | D  |
| -              | Deletion  | All                 | Prophage type-6H                                                  | -   | -   | D  |
| WP_011962309.1 | Point     | V3-5;V4-28          | BatB protein                                                      | Cy  | +/- | FS |
| WP_011963158.1 | Point     | V4-33               | Probable short-chain type dehydrogenase                           | Cy  | -/+ | AC |
| WP_011963925.1 | Point     | V3-5                | Probable ATP-dependent RNA helicase, DEAD/DEAH box family         | Cy  | -/- | AC |
| WP_011964545.1 | Point     | V4-33               | ATP synthase alpha subunit                                        | Cy  | -/- | AC |
| WP_011963121.1 | Point     | V1-20               | Probable UDP-N-acetylglucosamine acyltransferase                  | Cy  | -/- | AC |
| WP_011963517.1 | Point     | V4-33               | Gliding motility lipoprotein Gldj                                 | Uk  | -/+ | SC |

|                    |       |                              |                                                  |     |     |                 |
|--------------------|-------|------------------------------|--------------------------------------------------|-----|-----|-----------------|
| WP_0119<br>62997.1 | Point | V2-20;V3-5;V4-<br>24;V4-33   | Putative transcriptional<br>regulator XRE family | Cy  | -/- | AC              |
| WP_0119<br>64292.1 | Point | V3-5                         | Probable phage protein                           | Uk  | -/- | AC              |
| WP_0119<br>64292.1 | Point | V3-5                         | Probable phage protein                           | Uk  | -/- | <sup>d</sup> AC |
| WP_0163<br>61981.1 | Point | V3-5                         | Hypothetical protein                             | Uk  | -/- | <sup>d</sup> AC |
| WP_0163<br>61981.1 | Point | V3-5                         | Hypothetical protein                             | Uk  | -/- | <sup>d</sup> AC |
| WP_0163<br>61981.1 | Point | V3-5                         | Hypothetical protein                             | Uk  | -/- | <sup>d</sup> AC |
| WP_0163<br>61981.1 | Point | V3-5                         | Hypothetical protein                             | Uk  | -/- | <sup>d</sup> AC |
| WP_0119<br>63673.1 | Point | V1-20                        | Protein of unknown<br>function                   | Cy  | -/- | AC              |
| WP_0119<br>63960.1 | Point | V3-5                         | Protein of unknown<br>function Yfkh              | CyM | +/- | AC              |
| WP_0119<br>63961.1 | Point | V3-5                         | Protein of unknown<br>function                   | Cy  | -/- | AC              |
| WP_0119<br>63238.1 | Point | V1-20                        | Protein of unknown<br>function                   | CyM | +/+ | AC              |
| WP_0119<br>64248.1 | Point | V1-20; V3-<br>5;V4-24; V4-33 | Protein of unknown<br>function                   | CyM | +/+ | AC              |

21 <sup>a</sup>Cellular localization: Cytoplasmic (Cy); Cytoplasmic membrane (CyM); Unknown (Uk).

22 <sup>b</sup>THM/SP: Transmembrane helice/Signal peptide.

23 <sup>c</sup>Effect mutation: amino acid change (AC); frameshift (FS); stop codon (SC); Indels/

24 rearrangements (I/R); Deletion full gene (D).

25 <sup>d</sup>AC: mutation caused aminoacid change but the gene also presented a deletion.

26

27

28

29

30 Table S4. Elastinase activity in ancestral strain 950106-1/1 and the six phage resistant isolates

| Strain     | Elastinase activity |
|------------|---------------------|
| 950106-1/1 | +++                 |
| V1-20      | -                   |
| V2-20      | -                   |
| V3-5       | ++                  |
| V4-24      | -                   |
| V4-28      | -                   |
| V4-33      | -                   |

31 +++ “presence of elastinase activity”

32 ++ “reduced presence of elastinase activity”

33 - “absence of elastinase activity”

34

35 References:

36 1) Stenholm A.R., I. Dalsgaard, and M. Middelboe.2008. Isolation and characterization of  
 37 bacteriophages infecting the fish pathogen *Flavobacterium psychrophilum*. Appl. Environ.  
 38 Microbiol.**74**:4070-4078.

39 2) Castillo D., G. Higuera, M. Villa, M. Middelboe, I. Dalsgaard, L. Madsen, and R.T. Espejo.  
 40 2012 Diversity of *Flavobacterium psychrophilum* and the potential use of its phages for  
 41 protection against bacterial cold water disease in salmonids. J. Fish Dis. **35**:193-201.

42 3) Castillo D., R.H. Christiansen, R. Espejo, and M. Middelboe. 2014. Diversity and  
 43 geographical distribution of *Flavobacterium psychrophilum* isolates and their phages:  
 44 patterns of susceptibility to phage infection and phage host range. Microb. Ecol. **67**:748-  
 45 757.

46

47
